# Supplementary material for: Substance Use Disorder Among People With First-Episode Psychosis: A Systematic Review of Course and Treatment
Source: Atypon-hosted journal article supplement (doi:10.1176/ps.62.9.pss6209_1007), 2011-09-01
Supplement: fep-aod_resub_appendix a.pdf [file fep-aod_resub_appendix%20a.pdf]

Appendix A.

First-episode studies without specialized substance use disorder treatment

| Author             | Design, Follow-up Period, and Country                                | Participants                                                                                                                                                                                                                                                                                                                                                                                                            | Groups                                                                                                                                                                                                                                                                                                           | Measures and Method (if available)                                                                                                                                                                                                                  | Substance use outcomes                                                                                                                                                                                                          | Mental health outcomes                                                                                                                                                                                                               | Functional outcomes                                                                                                                                                                                             | Study Dropout (if available)                                                                           |
|--------------------|----------------------------------------------------------------------|-------------------------------------------------------------------------------------------------------------------------------------------------------------------------------------------------------------------------------------------------------------------------------------------------------------------------------------------------------------------------------------------------------------------------|------------------------------------------------------------------------------------------------------------------------------------------------------------------------------------------------------------------------------------------------------------------------------------------------------------------|-----------------------------------------------------------------------------------------------------------------------------------------------------------------------------------------------------------------------------------------------------|---------------------------------------------------------------------------------------------------------------------------------------------------------------------------------------------------------------------------------|--------------------------------------------------------------------------------------------------------------------------------------------------------------------------------------------------------------------------------------|-----------------------------------------------------------------------------------------------------------------------------------------------------------------------------------------------------------------|--------------------------------------------------------------------------------------------------------|
| Archie et al. (91) | Prospective cohort study. Follow-up: 12 months. Canada.              | N=200 new in- and outpatients, ages 16-50. 78% of clients were male, 61% were white, and mean age was 24. Diagnoses were schizophrenia (48%), schizophreniform (17%), schizoaffective (10%), delusional disorder (4%), brief psychotic disorder (3%), or psychotic disorder NOS (19%). 60% of clients had lifetime cannabis use; 38% current drug abuse, 26% current hazardous alcohol use, 18% current heavy drinking. | Comparison 1: Patients with drug abuse vs. Patients who did not meet criteria for drug abuse<br>Comparison 2: Patients with concurrent drug abuse and hazardous alcohol use vs. Patients who did not meet this criteria<br>Comparison 3: Patients with hazardous alcohol use vs. Patients without alcohol misuse | Diagnoses: Structured Clinical Interview for DSM (SCID)-IV (2).<br><br>Substance use: Alcohol Use Disorders Identification Test (AUDIT) (3).<br>Drug Abuse Screening Test (DAST) (4).<br><br>Assessments conducted by non-clinical, research staff. | At 12-month follow-up, significant reductions occurred in drug abuse (32% to 17%), hazardous alcohol use (21% to 10%), and concurrent drug abuse and hazardous alcohol use (11% to 2%), but not in heavy drinking (16% to 13%). | No significant differences in prevalence of involuntary hospitalizations between drug abusers and non-drug abusers, hazardous alcohol users and non-hazardous users, and concurrent abusers and non-concurrent abusers at 12 months. | No significant differences in prevalence of arrests between drug abusers and non-drug abusers, hazardous alcohol users and non-hazardous users, and concurrent abusers and non-concurrent abusers at 12 months. | N=49 missing at follow-up.<br><br>No significant baseline differences between missing and non-missing. |
| Baeza et al. (5)   | Case control study. Follow-up: 6 months after first admission Spain. | N=110 youth with first-episode psychosis, ages 9-17, who were new admissions to psychiatry departments. 67% of clients were male with mean age 16 years. Clients used                                                                                                                                                                                                                                                   | Cannabis users vs. Non-cannabis users                                                                                                                                                                                                                                                                            | Diagnoses: Kiddie Schedule for Affective Disorders and Schizophrenia (6).<br><br>Substance                                                                                                                                                          | Cannabis use decreased significantly at six months (from n=32 to n=15), but alcohol and other drug use did not. Cannabis                                                                                                        | Although cannabis users had significantly higher positive symptoms at the initial assessment, they had lower positive,                                                                                                               | No functional outcomes                                                                                                                                                                                          | N=9 missing at follow-up.                                                                              |

|                  |                                                               |                                                                                                                                                                                                                                                                                                                                                    |                                                                                                                                                                                                                         |                                                                                                                                                                                                                                                |                                                                                                                                                                                              |                                                                                                                                                                                                                                                                                                                                                       |                        |                                                                                                                             |
|------------------|---------------------------------------------------------------|----------------------------------------------------------------------------------------------------------------------------------------------------------------------------------------------------------------------------------------------------------------------------------------------------------------------------------------------------|-------------------------------------------------------------------------------------------------------------------------------------------------------------------------------------------------------------------------|------------------------------------------------------------------------------------------------------------------------------------------------------------------------------------------------------------------------------------------------|----------------------------------------------------------------------------------------------------------------------------------------------------------------------------------------------|-------------------------------------------------------------------------------------------------------------------------------------------------------------------------------------------------------------------------------------------------------------------------------------------------------------------------------------------------------|------------------------|-----------------------------------------------------------------------------------------------------------------------------|
|                  |                                                               | cannabis (29%), alcohol (22%), cocaine (8%), and smaller proportions of other drugs.                                                                                                                                                                                                                                                               |                                                                                                                                                                                                                         | <p>use: urine toxicology<br/>Self-report measure not reported.</p> <p>Assessments conducted by clinical staff.</p>                                                                                                                             | <p>users had higher positive symptoms at initial assessment, but at six months they had lower positive, negative, general, and total symptom scores, especially those who stopped using.</p> | <p>negative, general, and total negative symptom scores at 6 months, especially among those who stopped using cannabis, compared to the non-cannabis users</p>                                                                                                                                                                                        |                        |                                                                                                                             |
| Grech et al. (7) | Prospective cohort study. Follow-up: 4 years. United Kingdom. | N=119 patients <60 years old with recent onset psychosis. 66% were male, 33% were African/African-Caribbean, and mean age was 25 years. Diagnoses were schizophrenia (42%), affective psychoses (26%), schizoaffective (9%), delusional disorder (9%), atypical psychosis (7%), and schizophreniform (6%). 38% reported cannabis use at admission. | (1) History of cannabis use at index but not follow up, (2) No history of cannabis use at index and use at follow up, (3) History of cannabis use at index and use at follow up (4) No use at either index or follow up | <p>Diagnoses: Present State Examination (8) and Operational Criteria Checklist (9).</p> <p>Substance use: Self-report semi-structured interview unknown.</p> <p>Follow-up assessments conducted by research staff blind to admission data.</p> | Of 25 clients with cannabis use at baseline, 9 (36%) reported abstinence at follow-up.                                                                                                       | There was a significant increase in course of illness for clients with history of cannabis use at index and use at follow up. There was a significant increase in positive psychotic symptoms for clients with history of cannabis use at index and use at follow up. There were no significant differences in negative psychotic symptoms between no | No functional outcomes | <p>Complete data on 98 of 119 clients.</p> <p>No significant baseline differences between missing and non-missing data.</p> |

|                      |                                                                 |                                                                                                                                            |                                                                                                                                      |                                                                                                                 |                                                                                                                     |                                                                                                                                                                                                                                                                                                                              |                                                                                 |                                                                                                          |
|----------------------|-----------------------------------------------------------------|--------------------------------------------------------------------------------------------------------------------------------------------|--------------------------------------------------------------------------------------------------------------------------------------|-----------------------------------------------------------------------------------------------------------------|---------------------------------------------------------------------------------------------------------------------|------------------------------------------------------------------------------------------------------------------------------------------------------------------------------------------------------------------------------------------------------------------------------------------------------------------------------|---------------------------------------------------------------------------------|----------------------------------------------------------------------------------------------------------|
|                      |                                                                 |                                                                                                                                            |                                                                                                                                      |                                                                                                                 |                                                                                                                     | cannabis use group and any of the groups. There were no significant differences in illness course and positive psychotic symptoms between no cannabis and other groups, including clients with history of cannabis use at index but not follow-up and clients with no history of cannabis use at index and use at follow-up. |                                                                                 |                                                                                                          |
| Harrison et al. (10) | Prospective cohort study. Follow-up: 14 months. United Kingdom. | N=85 clients 16-50 years, with first-episode schizophrenia. 74% had a history of substance use. 48% of sample was male; mean age 26 years. | Comparison 1: (a) Persistent non-users (b) Persistent users<br>Comparison 2: (a) No history of substance use (b) Baseline only users | Diagnoses: DSM-IV, assessed by two senior clinicians<br><br>Substance use: Substance Use Rating Scale (11, 12). | Over 14 months, current use of cannabis decreased from 32% to 18.5% and problem drinking decreased from 30% to 15%. | Persistent users had significantly higher scores for positive syndrome, overall severity of illness and depressive features. No significant differences for negative and disorganization syndromes but positive syndrome scores changed over                                                                                 | There were no main effects of group for any of the cognitive function measures. | N=67 missing follow-up data.<br><br>No significant baseline differences between missing and non-missing. |

|                                             |                                                                           |                                                                                                                                                                                                                                    |                                                                                                                   |                                                                                                                                                         |                                                                                                                                    |                                                                                                                                                                                                                           |                                                                                                                |                                                                                                          |
|---------------------------------------------|---------------------------------------------------------------------------|------------------------------------------------------------------------------------------------------------------------------------------------------------------------------------------------------------------------------------|-------------------------------------------------------------------------------------------------------------------|---------------------------------------------------------------------------------------------------------------------------------------------------------|------------------------------------------------------------------------------------------------------------------------------------|---------------------------------------------------------------------------------------------------------------------------------------------------------------------------------------------------------------------------|----------------------------------------------------------------------------------------------------------------|----------------------------------------------------------------------------------------------------------|
|                                             |                                                                           |                                                                                                                                                                                                                                    |                                                                                                                   |                                                                                                                                                         |                                                                                                                                    | time across groups.                                                                                                                                                                                                       |                                                                                                                |                                                                                                          |
| Kovaszay et al. (13)                        | Longitudinal observation study.<br>Follow-up: 6 months.<br>United States. | N=176 clients with schizophrenia (N=87) or affective psychosis (N=89). Median age was 28; 51% were male and 22% were nonwhite. Most common substance of abuse was alcohol.                                                         | Lifetime substance use disorder vs. no lifetime substance use disorder                                            | Diagnoses: SCID-III (14).<br><br>Follow-up diagnoses obtained by two psychiatrists and consensus panel.                                                 | Clients with affective psychosis and a history of substance use disorders were more likely to be drinking alcohol at least weekly. | In the schizophrenia group, individuals with lifetime substance use disorder had psychiatric functioning via the BPRS. There were no differences in positive or negative symptoms or current hallucinations or delusions. | In the schizophrenia group, individuals with lifetime substance use disorder had lower past month functioning. | N=31 missing follow-up data.<br><br>No significant baseline differences between missing and non-missing. |
| Lambert et al. (15) and Hinton et al. (16). | Prospective cohort study.<br>Follow-up: 18 months.<br>Australia.          | N=643 new admissions, ages 15-29, with first-episode psychosis diagnoses of schizophreniform (42%), schizophrenia (23%), schizoaffective (7%), bipolar I with psychotic symptoms (20%), and other psychoses. Most were male (66%); | Decreased or remitted substance use disorder vs. persistent substance use disorder vs. no substance use disorder. | Diagnoses: DSM-IV assessment with reliability assessment of 115 randomly selected clients using SCID-IV (17).<br><br>Baseline and follow-up assessments | At 18 months, 155 (37.9%) were abstinent, 91 (22.2%) had decreased use, and 163 (39.9%) had persistent substance use disorders.    | Clients with decreased or remitted substance use disorder were more likely to be in remission of positive symptoms than clients with persistent substance use disorder. Clients with decreased or                         | No functional outcomes                                                                                         | N=291 had missing 18-month follow-up data.<br><br>Differences between missing and non-missing unknown.   |

|                        |                                                       |                                                                                                                                                                                                                  |                                                                                                                                                                                                                      |                                                                                                                 |                                                                                                                                                                      |                                                                                                                                                                                                             |                                                                                     |                                                                                                              |
|------------------------|-------------------------------------------------------|------------------------------------------------------------------------------------------------------------------------------------------------------------------------------------------------------------------|----------------------------------------------------------------------------------------------------------------------------------------------------------------------------------------------------------------------|-----------------------------------------------------------------------------------------------------------------|----------------------------------------------------------------------------------------------------------------------------------------------------------------------|-------------------------------------------------------------------------------------------------------------------------------------------------------------------------------------------------------------|-------------------------------------------------------------------------------------|--------------------------------------------------------------------------------------------------------------|
|                        |                                                       | mean age 22 years. Baseline substance use disorders were cannabis (71%), polysubstance (16%), and other substances (13%).                                                                                        |                                                                                                                                                                                                                      | conducted by clinicians.                                                                                        |                                                                                                                                                                      | remission of SUD had increased probability of psychotic symptom remission and clients with persistent substance use disorder had decreased probability of remission.                                        |                                                                                     |                                                                                                              |
| Turkington et al. (18) | Prospective cohort study. Follow-up: 1 year. Ireland. | N=188 individuals with first-episode psychosis, ages 18-64, from general psychiatric services. Mean age was 34 years, with 62% male.                                                                             | Individuals with substance misuse at both baseline and 1 year follow up vs. Individuals with substance misuse at baseline but not follow up vs individuals with no substance misuse at either baseline or follow up. | Diagnoses: Operational Criteria Checklist for Psychotic Illness (9).<br><br>Information on assessors unknown.   | At baseline, 43% had substance misuse (abuse or dependence), mostly alcohol and/or cannabis. At one-year follow-up, the rate of substance misuse decreased to 22.9%. | Those who persisted with substance misuse had more depressive symptoms at baseline. At follow-up, persistent misusers had more depressive symptoms, more positive symptoms of psychosis, and more relapses. | Persistent users had worse global functioning than those who stopped or never used. | N=91 missing from follow-up data (n=6) or not eligible because of diagnosis (n=85).                          |
| Verdoux et al. (19)    | Prospective cohort study. Follow up: 2 years. France. | N=65 individuals with psychosis admitted to acute ward of regional psychiatric hospitals. Sample was 62% men, with mean age of 32 years. Diagnoses were schizophrenia (37%) and other psychotic disorders (63%), | Long (>3 months) vs short (<3 months) duration of untreated psychosis                                                                                                                                                | Diagnoses: DSM-IV using Life Chart and hospital records.<br><br>Substance use: Life chart and hospital records. | At baseline 20 clients (30.8%) had a history of alcohol use disorder, and 15 (23.1%) had a history of drug use disorder. By six months, alcohol and drug use         | No psychiatric outcomes by substance use disorder status.                                                                                                                                                   | No functional outcomes by substance use disorder status.                            | N=1 missing at 1-year follow-up; N=6 missing at 18 and 24 months.<br><br>No significant baseline differences |

|  |  |                                                                                                           |  |                                                                  |                                                                                                      |  |  |                                  |
|--|--|-----------------------------------------------------------------------------------------------------------|--|------------------------------------------------------------------|------------------------------------------------------------------------------------------------------|--|--|----------------------------------|
|  |  | with 31% having history of alcohol use disorder and 23% having history of drug use disorders at baseline. |  | Assessments conducted by clinical psychologist and psychiatrist. | decreased to 5 of 64 (7.8%) and 4 of 64 (6.3%). The lower proportions remained stable for two years. |  |  | between missing and non-missing. |
|--|--|-----------------------------------------------------------------------------------------------------------|--|------------------------------------------------------------------|------------------------------------------------------------------------------------------------------|--|--|----------------------------------|

| Author                | Design, Follow-up Period, and Country                | Participants                                                                                                                                                                                                                                                                                                                                                                                                                                               | Interventions                                                                                                                                              | Measurement                                                                                                                                                                  | Substance use outcomes                                                                                                                                                                                                                                 | Mental health outcomes                                                                                                                                                                                                                                        | Functional outcomes                                                                                                                                                                                                                                                                                                                                                                                                                                                       | Study Dropout                                                                                                                                                                                                                                             |
|-----------------------|------------------------------------------------------|------------------------------------------------------------------------------------------------------------------------------------------------------------------------------------------------------------------------------------------------------------------------------------------------------------------------------------------------------------------------------------------------------------------------------------------------------------|------------------------------------------------------------------------------------------------------------------------------------------------------------|------------------------------------------------------------------------------------------------------------------------------------------------------------------------------|--------------------------------------------------------------------------------------------------------------------------------------------------------------------------------------------------------------------------------------------------------|---------------------------------------------------------------------------------------------------------------------------------------------------------------------------------------------------------------------------------------------------------------|---------------------------------------------------------------------------------------------------------------------------------------------------------------------------------------------------------------------------------------------------------------------------------------------------------------------------------------------------------------------------------------------------------------------------------------------------------------------------|-----------------------------------------------------------------------------------------------------------------------------------------------------------------------------------------------------------------------------------------------------------|
| Addington et al. (20) | Prospective cohort study. Follow-up: 3 years Canada. | N=203 inpatients and outpatients enrolled in Calgary Early Psychosis Program, with no more than three months previous treatment. 70% of clients were male; 77% were single; mean age = 25 years. Most clients had schizophrenia (70%); other diagnoses were schizophreniform, (15%) and other psychoses. 48% of clients had no substance abuse diagnosis; the most common abuse or dependence diagnoses were alcohol (16%), cannabis (15%), or both (11%). | Early intervention program that integrates substance abuse treatment, which is “addressed at each stage of the program, including the work with families.” | Diagnoses: SCID-IV (17).<br><br>Substance use: Case Manager Rating Scale for Substance Use Disorders (21).<br><br>Assessments were conducted by trained research clinicians. | Between baseline and year 1, substance misuse significantly declined. Little additional improvement between year 1 and 2. Significant decline in the number of clients with an alcohol, cannabis, and other drug use disorders over the 3-year period. | No significant differences in mental health symptoms at each follow up between alcohol users and non-users; significantly more positive symptoms and levels of depression among cannabis users at one year follow up, even after controlling for demographics | No significant differences in quality of life between alcohol users and non-users at any follow up; lower quality of life found in cannabis users than non-cannabis users in year 2 but no significant differences found in year 1 or 3. The mild use and substance misuse groups had higher equal or better cognition at follow up than non-users; compared to mild users or misusers, non-users scored more poorly on cognitive tasks of verbal memory, verbal fluency, | N=44 missing at 2 years. N=16 missing at 3 years.<br><br>No significant differences in missing and non-missing except those missing at year 2 had higher negative symptoms at year 1, and those missing at year 3 had higher negative symptoms at year 2. |

|                  |                                                         |                                                                                                                                                                                                                                                                                                                                                                                                                     |                                                                                                                                                                            |                                                                                                                                                                                                                                                 |                                                                                                                                                                                                                                                                                                           |                           |                                                                                                                                             |                                                                                                                                                                         |
|------------------|---------------------------------------------------------|---------------------------------------------------------------------------------------------------------------------------------------------------------------------------------------------------------------------------------------------------------------------------------------------------------------------------------------------------------------------------------------------------------------------|----------------------------------------------------------------------------------------------------------------------------------------------------------------------------|-------------------------------------------------------------------------------------------------------------------------------------------------------------------------------------------------------------------------------------------------|-----------------------------------------------------------------------------------------------------------------------------------------------------------------------------------------------------------------------------------------------------------------------------------------------------------|---------------------------|---------------------------------------------------------------------------------------------------------------------------------------------|-------------------------------------------------------------------------------------------------------------------------------------------------------------------------|
|                  |                                                         |                                                                                                                                                                                                                                                                                                                                                                                                                     |                                                                                                                                                                            |                                                                                                                                                                                                                                                 |                                                                                                                                                                                                                                                                                                           |                           | cognitive flexibility, and visuospatial ability at year 1, and verbal memory, verbal fluency, and visuospatial ability at year 2 follow-up. |                                                                                                                                                                         |
| Carr et al. (22) | Prospective cohort study. Follow-up: 18 months. Canada. | N=243 first-episode psychosis outpatients enrolled in the Early Intervention Program for Psychoses (PEPP) who were diagnosed with first-episode of psychosis, between 16-50 years of age, and met criteria for alcohol or drug abuse at baseline. Sample is 78% males and mean age = 25 years. Majority of sample (72%) diagnoses with schizophrenia spectrum; others were psychosis NOS (9%), mood disorders (7%), | PEPP (group-based program) clients who met criteria for alcohol or drug abuse at baseline vs. PEPP clients who did not meet criteria for alcohol or drug abuse at baseline | Diagnoses: SCID-III (14).<br><br>Substance use: AUDIT (3) and DAST (4).<br><br>Assessments conducted by masters-level research assistants.<br><br>Diagnoses confirmed based on clinical review and clinical opinion by consulting psychiatrist. | Decreased alcohol and drug misuse at 3 months, especially for clients with alcohol diagnosis; at 6 and 18 months, alcohol reductions maintained for clients without an alcohol diagnosis but worsened for clients with an alcohol diagnosis; drug reductions maintained by both groups at 6 and 18 months | No mental health outcomes | No functional outcomes                                                                                                                      | N=48 to 97 clients were missing substance use follow-up data.<br><br>No significant differences in missing data between those with and without substance use diagnoses. |



|                     |                                                                                            |                                                                                                                                                                                                                                                                                                                                                                                                                                                |                                                                                                                                                                       |                                                                                                                                              |                                                                                  |                                                              |                                                              |                                                                                                                                          |
|---------------------|--------------------------------------------------------------------------------------------|------------------------------------------------------------------------------------------------------------------------------------------------------------------------------------------------------------------------------------------------------------------------------------------------------------------------------------------------------------------------------------------------------------------------------------------------|-----------------------------------------------------------------------------------------------------------------------------------------------------------------------|----------------------------------------------------------------------------------------------------------------------------------------------|----------------------------------------------------------------------------------|--------------------------------------------------------------|--------------------------------------------------------------|------------------------------------------------------------------------------------------------------------------------------------------|
|                     |                                                                                            | and substance-induced psychosis (8%). Drugs of choice were primarily cannabis (61%), cannabis and alcohol (20%), and alcohol (9%).                                                                                                                                                                                                                                                                                                             |                                                                                                                                                                       |                                                                                                                                              |                                                                                  |                                                              |                                                              |                                                                                                                                          |
| Edwards et al. (23) | Single-blind randomized control trial. Follow-up: 3, 6 months post-intervention Australia. | N=47 outpatient youth newly admitted to integrated mental health service for cannabis-use with first-episode psychosis. Most were diagnosed with schizophrenia or schizophreniform disorders (71.7%), followed delusional or other psychosis (17.4%) and affective psychosis (10.9%). Almost half had a diagnosis of cannabis abuse or dependence (48.9%), and about three-quarters reported using cannabis in the past 4 weeks. There were no | Cannabis and Psychosis (CAP) Therapy for 3 months involving 10 weekly cognitive-behavioral harm minimization sessions delivered individually vs. Psychoeducation (PE) | Diagnoses: SCID-IV (17).<br><br>Substance use: Cannabis and Substance Use Assessment Schedule (24).<br><br>Information on assessors unknown. | No significant group differences in cannabis use or readiness to change outcomes | No significant group differences in psychopathology outcomes | No significant group differences in psychosocial functioning | Follow-up participation rates were similar across conditions (end of treatment: CAP, N=22, PE, N=23; and 6 months: CAP, N=23, PE, N=17). |

|                      |                                                                                                 |                                                                                                                                                                                                                                                                                                                                                                                                                            |                                                                                                                                              |                                                                                                                                                                       |                                                            |                                                                                                                                                                                                             |                                                                                                                   |                                                                                                       |
|----------------------|-------------------------------------------------------------------------------------------------|----------------------------------------------------------------------------------------------------------------------------------------------------------------------------------------------------------------------------------------------------------------------------------------------------------------------------------------------------------------------------------------------------------------------------|----------------------------------------------------------------------------------------------------------------------------------------------|-----------------------------------------------------------------------------------------------------------------------------------------------------------------------|------------------------------------------------------------|-------------------------------------------------------------------------------------------------------------------------------------------------------------------------------------------------------------|-------------------------------------------------------------------------------------------------------------------|-------------------------------------------------------------------------------------------------------|
|                      |                                                                                                 | baseline differences with respect to demographic or clinical variables.                                                                                                                                                                                                                                                                                                                                                    |                                                                                                                                              |                                                                                                                                                                       |                                                            |                                                                                                                                                                                                             |                                                                                                                   |                                                                                                       |
| Gleeson et al. (25)  | Single-blind randomized control study. Follow-up: 7 months after starting treatment. Australia. | N=82 first-episode psychosis outpatients, ages 15-25, from the Early Psychosis Prevention and Intervention Center. 63% of clients were male, with average age 20 years. Clients had diagnoses of schizophrenia (33%), psychotic disorder NOS (30%), schizophreniform (11%), and other related disorders. Substance abuse/dependence was primarily cannabis (52%), alcohol (25%), amphetamine (19%), or hallucinogen (15%). | Relapse Prevention Treatment combined with usual treatment (individual and family-based cognitive-behavioral therapy) vs. treatment as usual | Diagnoses: SCID-IV (17).<br><br>Substance use: WHO Alcohol, Smoking, and the Substance Dependence Scale (26).<br><br>Assessments conducted by trained research staff. | No significant group differences in substance use measures | Decreased relapse rates (i.e., hospital readmissions) ; improved Scale for the Assessment of Negative Symptoms score; no significant group differences on other symptom measures or in medication adherence | No significant group differences in quality of life, health satisfaction, and social and occupational functioning | N=1 missing at follow-up.<br><br>No significant baseline differences between missing and non-missing. |
| Kavanagh et al. (27) | Randomized control trial. Follow-up: 6                                                          | N=25 inpatients, ages 18–35, with early psychosis and                                                                                                                                                                                                                                                                                                                                                                      | Standard care plus Start Over and Survive (SOS) curriculum, a 3-                                                                             | Diagnoses: Clinical record review and consensus.                                                                                                                      | No significant group differences in substance use          | No mental health outcomes assessed due                                                                                                                                                                      | No functional outcomes                                                                                            | Any missing data at follow-up were rated as                                                           |

|  |                                                                        |                                                                                                                                                                                                                                                                 |                                                                                                                                                                                                          |                                                                                                                                                                                                                                |                                                                                                                      |                                      |  |                                       |
|--|------------------------------------------------------------------------|-----------------------------------------------------------------------------------------------------------------------------------------------------------------------------------------------------------------------------------------------------------------|----------------------------------------------------------------------------------------------------------------------------------------------------------------------------------------------------------|--------------------------------------------------------------------------------------------------------------------------------------------------------------------------------------------------------------------------------|----------------------------------------------------------------------------------------------------------------------|--------------------------------------|--|---------------------------------------|
|  | <p>weeks, 6 months, 12 months after starting treatment. Australia.</p> | <p>current misuse of non-opioid drugs. Sample was mostly male (60%) and white (84%) with mean age 23 years. 48% had a chart diagnosis of schizophrenia or schizophreniform disorders. 88% used alcohol and 76% used marijuana during the previous 3 months.</p> | <p>hour manualized intervention for substance misuse in early psychosis vs. Standard care only (medication, inpatient and aftercare services with case management or general practice consultations)</p> | <p>Substance use disorders confirmed by Composite International Diagnostic Interview (28).</p> <p>Operational Criteria Checklist (9).</p> <p>Assessments conducted by trained research staff blind to treatment condition.</p> | <p>at 6 and 12 months for a subset of those who were engaged in treatment and received motivational enhancement.</p> | <p>to attrition and missing data</p> |  | <p>“unimproved” on substance use.</p> |
|--|------------------------------------------------------------------------|-----------------------------------------------------------------------------------------------------------------------------------------------------------------------------------------------------------------------------------------------------------------|----------------------------------------------------------------------------------------------------------------------------------------------------------------------------------------------------------|--------------------------------------------------------------------------------------------------------------------------------------------------------------------------------------------------------------------------------|----------------------------------------------------------------------------------------------------------------------|--------------------------------------|--|---------------------------------------|

Note: NOS=not otherwise specified

1. Archie S, Rush BR, Akhtar-Danesh N, et al: Substance use and abuse in first-episode psychosis: prevalence before and after early intervention. *Schizophrenia Bulletin* 33(6):1354-63, 2007.
2. Williams JB, Gibbon M, First MB, et al: The structured clinical interview for DSM-III-R SCID: Multisite test-retest reliability. *Archives of General Psychiatry* 49:630–36, 1992.
3. Saunders JB, Aasland OG, Babor TF et al: Development of the Alcohol Use Disorders Identification Test (AUDIT): WHO collaborative project on early detection of persons with harmful alcohol consumption II. *Addiction* 88:791–804, 1993.
4. Sinner HA: The drug abuse screening test. *Addictive Behaviors* 7:371, 1982.
5. Baeza I, Graell M, Moreno D, et al: Cannabis use in children and adolescents with first episode psychosis: influence on psychopathology and short-term outcome (CAFEPS study). *Schizophrenia Research* 113(2-3):129-37, 2009.
6. Kaufman J, Birmaher B, Brent, D, et al: Schedule for affective disorders and schizophrenia for school-age children-present and lifetime version (K-SADS-PL): initial reliability and validity data. *Journal of the American Academy of Child and Adolescent Psychiatry* 36:980–988, 1997.
7. Grech A, Van Os J, Jones PB, et al: Cannabis use and outcome of recent onset psychosis. *European Psychiatry* 20(4):349-53, 2005.
8. Wing JK, Cooper JE, Sartorius N: The measurement and classification of psychiatric symptoms. Cambridge: Cambridge University Press, 1974.
9. McGuffin P, Farmer A, Harvey I: A poly-diagnostic application of operational criteria in psychotic illness: development and reliability of the OPCRIT system. *Archives of General Psychiatry* 48:764–770, 1991.

10. Harrison I, Joyce EM, Mutsatsa SH, et al: Naturalistic follow-up of co-morbid substance use in schizophrenia: the West London first-episode study. *Psychological Medicine* 38(1):79-88, 2008.
11. Duke PJ, Pantelis C, Barnes TRE: South Westminster Schizophrenia Survey. Alcohol use and its relationship to symptoms, tardive dyskinesia and illness onset. *British Journal of Psychiatry* 164: 630–36, 1994.
12. Duke PJ, Pantelis C, McPhillips MA, et al: Comorbid substance misuse among people with schizophrenia in the community: an epidemiological study in central London. *British Journal of Psychiatry* 179:501–13, 2001.
13. Kovasznay B, Fleischer J, Tanenberg-Karant M, et al: Substance use disorder and the early course of illness in schizophrenia and affective psychosis. *Schizophrenia Bulletin* 23(2):195–201, 1997.
14. Spitzer R, Williams J, Gibbon M, et al: The Structured Clinical Interview for *DSM-III-R* (SCID): I. History, rationale and description. *Archives of General Psychiatry* 49:624-629, 1992.
15. Lambert M, Conus P, Lubman DT, et al: The impact of substance use disorders on clinical outcomes in 643 patients with first episode psychosis. *Acta Psychiatrica Scandinavica* 112:141-8, 2005.
16. Hinton M, Edwards J, Elkins K, et al: Reductions in cannabis and other illicit substance use between treatment entry and early recovery in patients with first-episode psychosis. *Early Intervention in Psychiatry* 1:259-266, 2007.

17. First MB, Gibbon M, Spitzer RL, et al: Structured Clinical Interview for DSM-IV Axis I Disorders – Research Version. Patient Edition with Psychotic Screen. New York: Biometrics Research Department, New York State Psychiatric Institute, 1996.
18. Turkington A, Mulholland CC, Rushe TM, et al: Impact of persistent substance misuse on 1-year outcome in first-episode psychosis. *The British Journal of Psychiatry* 195:242-8, 2009.
19. Verdoux H, Liraud F, Gonzales B, et al: Predictors and outcome characteristics associated with suicidal behaviour in early psychosis: a two-year follow-up of first-admitted subjects. *Acta Psychiatrica Scandinavica* 103:347-354, 2001.
20. Addington J, Addington D: Impact of an early psychosis program on substance use. *Psychiatric Rehabilitation Journal* 25(1):60-7, 2001.
21. Drake RE, Osher FC, Wallach MA: Alcohol use and abuse in schizophrenia. *Journal of Nervous and Mental Disease* 17: 408-414, 1989.
22. Carr JAR, Norman RMG, Manchanda R: Substance misuse over the first 18 months of specialized intervention for first episode psychosis. *Early Intervention in Psychiatry* 3(3):221-5, 2009
23. Edwards J, Elkins K, Hinton M, et al: Randomized controlled trial of a cannabis-focused intervention for young people with first-episode psychosis. *Acta Psychiatrica Scandinavica* 114(2):109-17, 2006.
24. Wing JK, Babor T, Brugha T, et al: SCAN. Schedules for Clinical Assessment in Neuropsychiatry. *Archives of General Psychiatry* 47:589–93, 1990.

25. Gleeson JF, Cotton SM, Alvarez-Jimenez M, et al: A randomized controlled trial of relapse prevention therapy for first-episode psychosis patients. *Journal of Clinical Psychiatry* 70(4):477-86, 2009.
26. Ali R, Awwad E, Babor T, et al: The alcohol, smoking and substance involvement screening test (ASSIST): development, reliability, and feasibility. *Addiction* 97:1183-94, 2009.
27. Kavanagh DJ, Waghorn G, Jenner L, et al: Demographic and clinical correlates of co-morbid substance use disorders in psychosis: multivariate analyses from an epidemiological sample. *Schizophrenia Research* 66:115–124, 2004.
28. Robins LN, Wing J, Wittchen HU, et al: The Composite International Diagnostic Interview. An epidemiological instrument suitable for use in conjunction with different diagnostic systems and in different cultures. *Archives of General Psychiatry* 45: 1069–1077, 1988.
